# Supplementary material
Source: PubMed Central journal article supplement (PMC3500399)
Supplement: NIHMS412956-supplement-Tables_S1-S4.pdf [file NIHMS412956-supplement-Tables_S1-S4.pdf]

Table S1. Cell-Type-Specific Properties, Related to Figure 3

| Cell type  | color       | strong PINs |         |      |       | weak PINs | SHR prod. | SCR prod. | cell width (µm) |
|------------|-------------|-------------|---------|------|-------|-----------|-----------|-----------|-----------------|
|            |             | rootw.      | shootw. | inw. | outw. | inw.      |           |           |                 |
| vascular   | red         | X           |         |      |       |           | X         |           | 5               |
| pericycle  | orange      | X           |         |      |       |           | X         |           | 5               |
| QC         | dark gray   | X           |         |      |       |           |           | X         | ~ 20            |
| endodermis | yellow      | X           |         | X    |       |           |           | X         | 12              |
| cortex MZ  | green       | X           |         |      |       | X         |           | X         | 20              |
| CEI        | dark green  | X           |         |      |       | X         |           | X         | ~ 25            |
| cortex EZ  | light green |             | X       |      |       | X         |           | X         | 20              |
| epidermis  | blue        |             | X       |      |       | X         |           | X         | 17              |
| LEI        | purple      |             | X       |      |       | X         |           | X         | ~ 17            |
| LRC        | light gray  |             | X       |      |       | X         |           | X         | 20              |
| columella  | cyan        | X           | X       | X    | X     |           |           | X         | ~ 20            |

QC: quiescent center; CEI: cortex-endodermis initial; LEI: lateral root cap-epidermis initial; LRC: lateral root cap; MZ: meristem zone; EZ: elongation zone; rootw.: rootwards; shootw.: shootwards; inw.: inwards; outw.: outwards. Cell height is 48 µm in the EZ and 16 µm in the MZ.

Table S2. Parameter Values of Models 1 and 2, Related to Figures 3 and 4

| symbol         | description                                                       | unit                             | value           | range of bistability                        | range of conservation spatial patterning |
|----------------|-------------------------------------------------------------------|----------------------------------|-----------------|---------------------------------------------|------------------------------------------|
| $D_X$          | auxin diffusion coefficient                                       | $\mu\text{m}^2/\text{s}$         | 600             |                                             |                                          |
| $P_{in}$       | influx auxin permeability                                         | $\mu\text{m}/\text{s}$           | 20              |                                             |                                          |
| $P_{e_{bg}}$   | background PIN efflux permeability                                | $\mu\text{m}/\text{s}$           | 1               |                                             |                                          |
| $P_{e_{SPIN}}$ | permeability due to strong PIN expression                         | $\mu\text{m}/\text{s}$           | 20              |                                             |                                          |
| $P_{e_{WPIN}}$ | permeability due to weak PIN expression                           | $\mu\text{m}/\text{s}$           | 5               |                                             |                                          |
| $d_X$          | auxin decay                                                       | $\text{s}^{-1}$                  | $10^{-4}$       |                                             |                                          |
| $K$            | fold diffusion rate reduction in cell wall                        | —                                | 15              |                                             |                                          |
| $D_H$          | SHR diffusion coefficient                                         | $\mu\text{m}^2/\text{s}$         | 0.2             |                                             |                                          |
| $V_n$          | nuclear volume                                                    | $\mu\text{m}^2$                  | 10              |                                             |                                          |
| $X$            | typical auxin concentration (ODE analysis)                        | a.u.                             | 1000            | $0 - 1.40 \times 10^4$                      |                                          |
| $c_{H_c}$      | rate by which SHR leaves nucleus                                  | $\text{h}^{-1}$                  | 1               | $0 - 1.77 \times 10^7$                      | $0 - 10^{15}$                            |
| $c_{H_n}$      | rate by which SHR enters the nucleus                              | $\text{a.u.}^{-1} \text{h}^{-1}$ | 5               | $7.43 \times 10^{-7} - 140.4$               | $7.92 \times 10^{-7} - 28.0$             |
| $c_R$          | RBR phosphorylation rate by CYCD6;1                               | $\text{a.u.}^{-1} \text{h}^{-1}$ | 20              | $0 - 4.07 \times 10^4$                      | $2.58 \times 10^{-6} - 110$              |
| $c_S$          | $H_n$ -S combined action saturation constant                      | a.u.                             | 1000            | $3.37 - \infty$                             | $1.45 - 10^6$                            |
| $c_T$          | SCR-RBR complex formation                                         | $\text{a.u.}^{-1} \text{h}^{-1}$ | 0.4             | $8.28 \times 10^{-2} - \infty$              | $5.78 \times 10^{-4} - 225$              |
| $c_X$          | auxin conc. of half-max auxin-dependent <i>CYCD6;1</i> activation | a.u.                             | $2 \times 10^4$ | $1.43 \times 10^3 - \infty$                 | $0 - \infty$                             |
| $d_C$          | CYCD6;1 decay rate                                                | $\text{h}^{-1}$                  | 1               | $0 - \infty$                                | $0 - 10^6$                               |
| $d_{H_c}$      | cytosolic SHR decay rate                                          | $\text{h}^{-1}$                  | 1               | $0 - 8.83 \times 10^6$                      | $0.44 - 4.17 \times 10^5$                |
| $d_{H_n}$      | nuclear SHR decay rate                                            | $\text{h}^{-1}$                  | 1               | $0^* - 1.27 \times 10^3$                    | $0.05 - 6.92 \times 10^3$                |
| $d_R$          | RBR <sup>P</sup> decay rate                                       | $\text{h}^{-1}$                  | 1               | $4.91 \times 10^{-4} - \infty$              | $0 - 8.71 \times 10^3$                   |
| $d_S$          | SCR decay rate                                                    | $\text{h}^{-1}$                  | 10              | $0^* - 4.38 \times 10^3$                    | $0 - 4.61 \times 10^3$                   |
| $d_T$          | SCR-RBR decay rate                                                | $\text{h}^{-1}$                  | 10              | $1.64 \times 10^{-4} - \infty$              | $0 - 1.70 \times 10^7$                   |
| $H$            | Hill coefficient auxin-dependent <i>CYCD6;1</i> activation        | —                                | 3               | $3.59 \times 10^{-1} - \infty$              | $0 - 65.4$                               |
| $p_C$          | SHR-SCR and auxin-dependent <i>CYCD6;1</i> production rate        | $\text{a.u.}^{-1} \text{h}^{-1}$ | 40              | $0 - 8.15 \times 10^4$                      | $0 - 242$                                |
| $P_{H_c}$      | cytosolic SHR production rate (spatial model)                     | $\text{a.u.} \text{h}^{-1}$      | 1500.           |                                             | $0 - 3 \times 10^3$                      |
|                | cytosolic SHR influx rate into CEI (ODE analysis)                 | $\text{a.u.} \text{h}^{-1}$      | 137.5           | $0.108 - 3.72 \times 10^3$                  |                                          |
| $p_{S1}$       | SHR and SCR co-dependent SCR production rate                      | $\text{a.u.}^{-1} \text{h}^{-1}$ | 5               | $1.17 \times 10^{-2} - 110$                 | $0 - 19.9$                               |
| $p_{S2}$       | background SCR production rate                                    | $\text{a.u.} \text{h}^{-1}$      | 0.5             | $0^* - 9.81$                                | $0 - 1.87$                               |
| $R$            | total RBR                                                         | a.u.                             | 5000.           | $1.04 \times 10^3 - 2.03 \times 10^9$       | $1.2 \times 10^3 - 2.51 \times 10^6$     |
| $Z$            | geometric factor of CEI (ODE analysis)                            | —                                | 0.01858         | $6.87 \times 10^{-4} - 1.86 \times 10^{-2}$ |                                          |

Default parameter values used in all simulations and analyses, except when indicated otherwise, see figure captions and section “Specific extra details regarding the simulations” in “Modeling Procedures.”

\*: Any parameter value larger than zero presents bistability, but there is no bistability when the parameter is exactly zero.

Table S3. Parameter Sweeps, Related to Figure 4

|               | 10-fold | 100-fold | 1000-fold | $1 \times 10^6$ -fold | $1 \times 10^9$ -fold |
|---------------|---------|----------|-----------|-----------------------|-----------------------|
| $X=1000$      | 97.53   | 83.74    | 68.16     | 38.61                 | 27.21                 |
| $X=10,000$    | 65.66   | 58.88    | 53.27     | 35.53                 | 26.19                 |
| Random 1,1    | 0.09    | 1.34     | 2.89      | 4.93                  | 5.82                  |
| Random 1,1000 | 99.99   | 91.47    | 70.77     | 35.99                 | 24.56                 |

Robustness was analyzed by percentage of simulation runs that yielded bistability (values in table), for varying fold variations in parameter range (columns). We performed robustness analysis for different levels of auxin (two top rows). We also repeated the analysis by setting all default parameters to 1 and varying values around that value (third row) as well as setting all rates to 1 and all mass dependent parameters to 1000, and then varying around these (last row).

Table S4. Parameter Values of Model 3, Related to Figure 5

| symbol   | description                                                       | unit                             | value           | range of bistability                            | range of conservation spatial patterning |
|----------|-------------------------------------------------------------------|----------------------------------|-----------------|-------------------------------------------------|------------------------------------------|
| $X$      | typical auxin concentration (ODE analysis)                        | a.u.                             | 1000            | $0 - 1.16 \times 10^4$                          |                                          |
| $c_A$    | SHR-SCR complex formation                                         | $\text{a.u.}^{-1} \text{h}^{-1}$ | 5               | $6.24 \times 10^{-2} - \infty$                  | $0 - 10.7$                               |
| $c_R$    | RBR phosphorylation rate by CYCD6;1                               | $\text{a.u.}^{-1} \text{h}^{-1}$ | 0.01            | $0 - 13.1$                                      | $0 - 1.29 \times 10^{-1}$                |
| $c_T$    | SCR-RBR complex formation                                         | $\text{a.u.}^{-1} \text{h}^{-1}$ | 0.4             | $3.23 \times 10^{-2} - \infty$                  | $4.49 \times 10^{-4} - 2.64 \times 10^3$ |
| $c_X$    | auxin conc. of half-max auxin-dependent <i>CYCD6;1</i> activation | a.u.                             | $2 \times 10^4$ | $1.72 \times 10^3 - \infty$                     | $0 - \infty$                             |
| $c_U$    | binding of SHR-SCR to RBR                                         | $\text{a.u.}^{-1} \text{h}^{-1}$ | 0.4             | $1.09 \times 10^{-3} - 4.76$                    | $0 - 2 \times 10^3$                      |
| $c_{U2}$ | binding of SHR to SCR-RBR                                         | $\text{a.u.}^{-1} \text{h}^{-1}$ | 5               | $0 - 401$                                       | $8.49 \times 10^{-2} - 1.20 \times 10^5$ |
| $d_A$    | SHR-SCR decay rate                                                | $\text{h}^{-1}$                  | 1               | $0^* - 29.7$                                    | $0.39 - 136$                             |
| $d_C$    | CYCD6;1 decay rate                                                | $\text{h}^{-1}$                  | 1               | $7.64 \times 10^{-4} - \infty$                  | $0 - 10^7$                               |
| $d_H$    | SHR decay rate                                                    | $\text{h}^{-1}$                  | 1               | $0 - 1.92 \times 10^6$                          | $0 - 10^7$                               |
| $d_R$    | RBR <sup>P</sup> decay rate                                       | $\text{h}^{-1}$                  | 1               | $7.64 \times 10^{-4} - \infty$                  | $0 - 9.55 \times 10^6$                   |
| $d_S$    | SCR decay rate                                                    | $\text{h}^{-1}$                  | 10              | $0^* - 86.5$                                    | $4.7 - 10^7$                             |
| $d_T$    | SCR-RBR decay rate                                                | $\text{h}^{-1}$                  | 10              | $2.24 \times 10^{-2} - 86.8$                    | $0 - 114$                                |
| $d_U$    | SHR-SCR-RBR decay rate                                            | $\text{h}^{-1}$                  | 1               | $3.17 \times 10^{-2} - \infty$                  | $0 - 1.10 \times 10^7$                   |
| $H$      | Hill coefficient auxin-dependent <i>CYCD6;1</i> activation        | —                                | 3               | $5.45 \times 10^{-1} - \infty$                  | $0 - 65.7$                               |
| $p_C$    | SHR-SCR and auxin-dependent <i>CYCD6;1</i> production rate        | $\text{h}^{-1}$                  | 8000            | $0 - 1.05 \times 10^7$                          | $0 - 1.08 \times 10^5$                   |
| $p_H$    | SHR production rate (spatial model)                               | a.u./h                           | 300             |                                                 | $0 - 687$                                |
|          | SHR influx rate into CEI (ODE analysis)                           | a.u./h                           | 137.5           | $19.9 - 3.04 \times 10^4$                       |                                          |
| $p_{S1}$ | SHR-SCR-dependent SCR production rate                             | $\text{h}^{-1}$                  | 1000            | $140 - 3.72 \times 10^5$                        | $0 - 2.17 \times 10^3$                   |
| $p_{S2}$ | background SCR production rate                                    | a.u./h                           | 100             | $1.19 \times 10^{-1\dagger} - 4.47 \times 10^4$ | $0 - 4.57 \times 10^4$                   |
| $R$      | total RBR                                                         | a.u.                             | 5000            | $808 - 3.45 \times 10^4$                        | $1.5 \times 10^3 - 4.85 \times 10^5$     |
| $z$      | geometric factor of CEI (ODE analysis)                            | —                                | 0.01858         | $6.58 \times 10^{-5} - 1.31 \times 10^{-1}$     |                                          |

Default parameter values used in all simulations and analyses, except when indicated otherwise, see figure captions and section “Specific extra details regarding the simulations” in the Supplementary Modeling Procedures. Parameter values regarding auxin, SHR transport and nuclear volume are as given in Table S2.

\*: Any parameter value larger than zero presents bistability, but there is no bistability when the parameter is exactly zero.

†: Hopf bifurcation (all other boundary points are fold bifurcations).
